# Supplementary material
Source: PubMed Central journal article supplement (PMC2268550)

**A**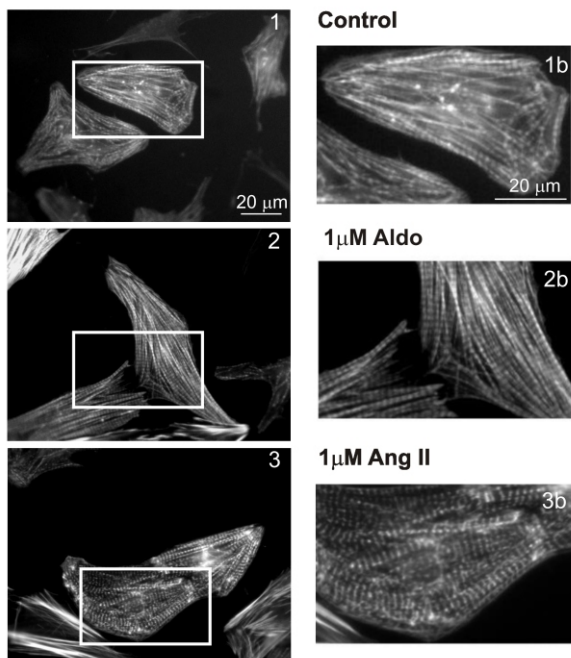**B**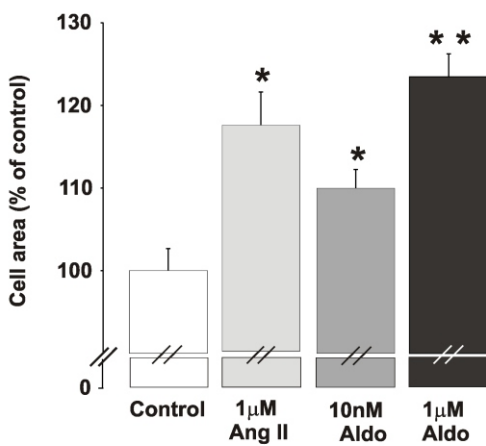**C**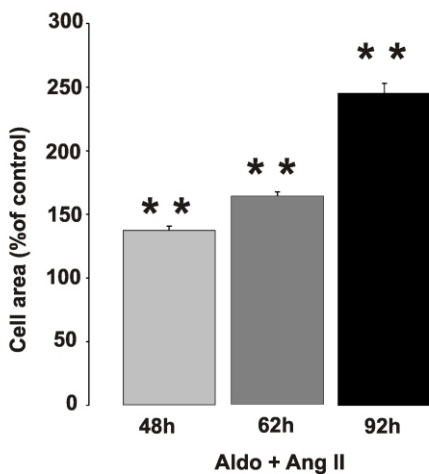

Supplement: pnas_0712316105_1.pdf [file pnas_0712316105_1.pdf]

**A**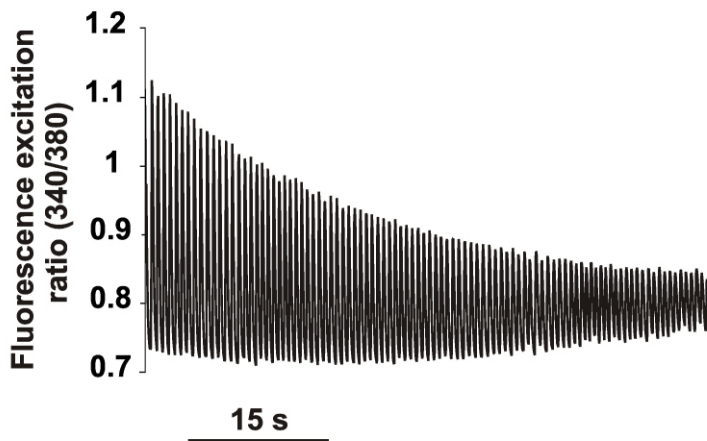**B**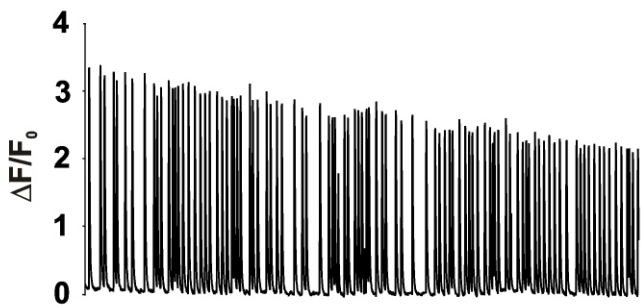**C**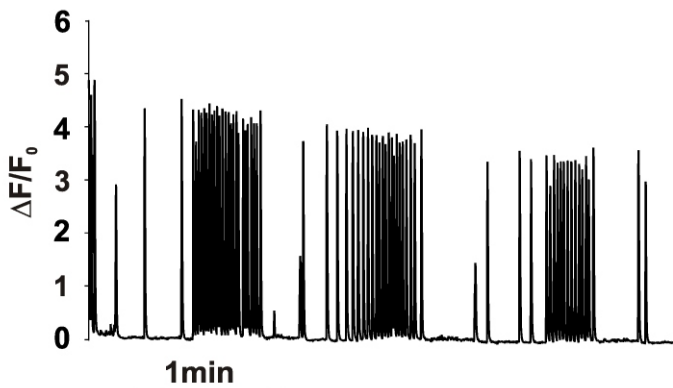

Supplement: pnas_0712316105_2.pdf [file pnas_0712316105_2.pdf]

Before Ang II

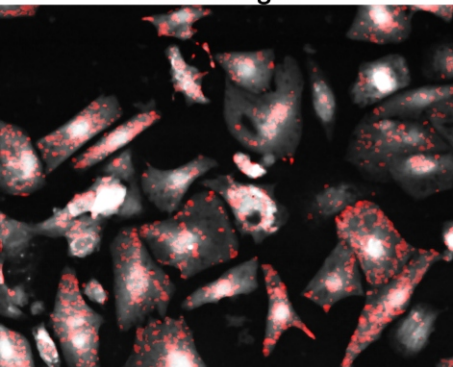

After Ang II

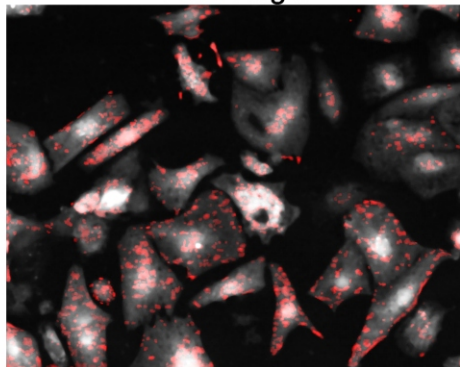

Before KCl

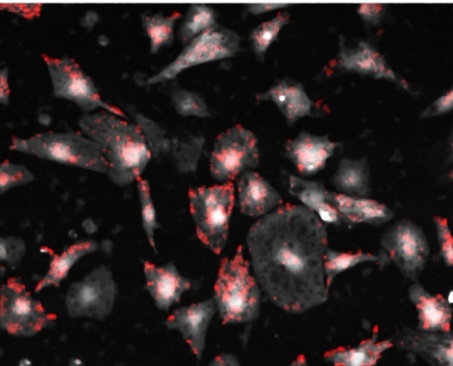

After KCl

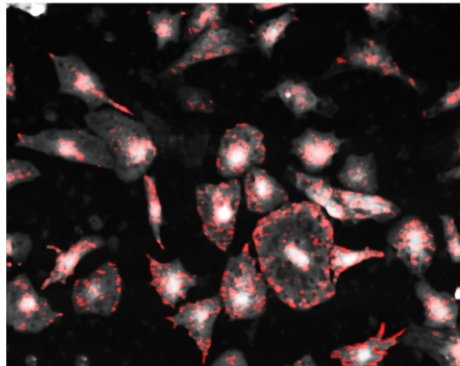

Supplement: pnas_0712316105_3.pdf [file pnas_0712316105_3.pdf]

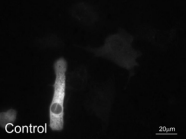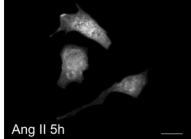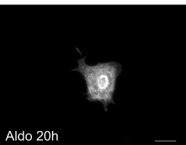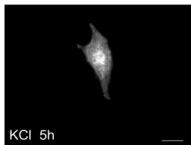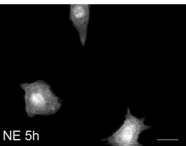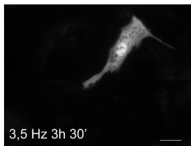

Supplement: pnas_0712316105_4.pdf [file pnas_0712316105_4.pdf]

**Nuclei positive for NFAT-GFP**

**(% of control)**

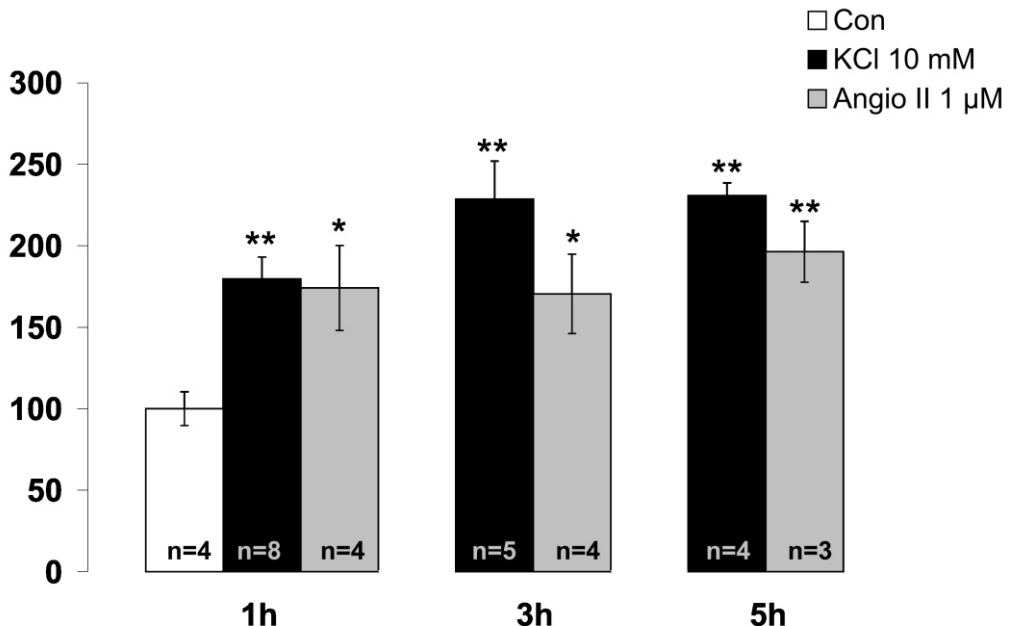

Supplement: pnas_0712316105_5.pdf [file pnas_0712316105_5.pdf]
